# Supplementary material for: CCT6A promotes cell proliferation in colon cancer by targeting BIRC5 associated with p53 status
Source: Research Square preprint supplement (doi:10.21203/rs.3.rs-3831856/v1), 2024-03-14
Supplement: Supplementary file 1 [file 9d5f576a27dc8d0f0a69253f.docx]

**SUPPLEMENTARY INFORMATION**

**Supplementary Figure 1.**

(**A**) EdU incorporation assay to detect the proliferation of stable CCT6A knockdown in HCT116 and SW480 cells. (**B**) Effect of CCT6A on the cell cycle determined using flow cytometry.

**Supplementary Figure 2.**

(**A**) Correlation analysis of core DEGs (MCM4, MCM7, CCNB2, PCNA, and BIRC5) and CCT6A in TCGA colon cancer dataset. (**B**) GSEA of the differentially expressed proteins affected by CCT6A knockdown.

**Supplementary Figure 3.**

Sequencing results of the wild-type p53 of HCT116 and LoVo cells and the p53 mutation site in HT29 and SW480 cells.

**Supplementary Table 1.**

Sequences of PCR primers and shRNAs
