# Supplementary material for: CCT6A promotes cell proliferation in colon cancer by targeting BIRC5 associated with p53 status
Source: Research Square preprint supplement (doi:10.21203/rs.3.rs-3831856/v1), 2024-03-14
Supplement: Supplementary file 2 [file c6a6257b5720f91bd3f60b26.docx]

**Supplementary Table 1: Sequences of PCR primers and shRNAs**

|  | **PCR primers** |
| --- | --- |
| **CCT6A** |  |
| Forward | 5’-GCAGCAGAAGTAGGCGTATGG-3’ |
| Reverse | 5’-TCGCATGATCTCATCAACCAAG-3’ |
| **BIRC5** |  |
| Forward | 5’-AGGACCACCGCATCTCTACAT-3’ |
| Reverse | 5’-AAGTCTGGCTCGTTCTCAGTG-3’ |
| **MCM4** |  |
| Forward | 5’- TGAACCTCTATACATGCAACGAC -3’ |
| Reverse | 5’-CAGGGTAACGGTCAAAGAAGATT-3’ |
| **MCM7** |  |
| Forward | 5’- ACTCTCAGAAACCTACCTGGAAG -3’ |
| Reverse | 5’- CAGCTTTTCGTAGAAATCCTCCT -3’ |
| **CCNB2** |  |
| Forward | 5’- TTGGCTGGTACAAGTCCACTC -3’ |
| Reverse | 5’- TGGGAACTGGTATAAGCATTGTC -3’ |
| **PCNA** |  |
| Forward | 5’- CCTGCTGGGATATTAGCTCCA -3’ |
| Reverse | 5’- CAGCGGTAGGTGTCGAAGC -3’ |
| **p53** |  |
| Forward | 5’-GAGGTTGGCTCTGACTGTACC-3’ |
| Reverse | 5’-TCCGTCCCAGTAGATTACCAC-3’ |
| **BIRC5-full length** |  |
| Forward | 5’-TGACGACCCCATAGAGGAACAT-3’ |
| Reverse | 5’-TCTTGGCTCTTTCTCTGTCCAGT-3’ |
| **BIRC5-3α** |  |
| Forward | 5’-GCCCAGTGTTTCTTCTGCTTC -3’ |
| Reverse | 5’-CTAACAGAGCTCTCTCATGGGGT-3’ |
| **BIRC5-3B** |  |
| Forward | 5’-CAGTTTGAAGAATTAACCCTTGGTG-3’ |
| Reverse | 5’-GCTAACAGAGCTCTCTCAATTTTGTT-3’ |
| **BIRC5-2B** |  |
| Forward | 5’-AGGCGGGCGGATCACGA-3’ |
| Reverse | 5’-AGGAAAGCGCAACCGGACG-3’ |
| **BIRC5 image** |  |
| Forward | 5’-GGCCCAGTGGGTTTTTTGC-3’ |
| Reverse | 5’-GCAACCGGACGAATGCTTT-3’ |
| **BIRC5-△EX3** |  |
| Forward | 5’-AGATGACGACCCCATGCAAA-3’ |
| Reverse | 5’-CCAGGGAATAAACCCTGGAAG-3’ |
| **GAPDH** |  |
| Forward | 5’-GGTATGACAACGAATTTGGC-3’ |
| Reverse | 5’-GAGCACAGGGTACTTTATTG-3’ |
|  |  |
|  | **shRNA** |
| **shCCT6A** |  |
| Forward | 5’-AAGGGCACCATGAAGATGCTC-3’ |
| Reverse | 5’-GAGCATCTTCATGGTGCCCTT-3’ |
